# Supplementary material for: Preclinical development of 1B7/CD3, a novel anti-TSLPR bispecific antibody that targets CRLF2-rearranged Ph-like B-ALL
Source: PubMed Central journal article supplement (PMC10539166; doi:10.1038/s41375-023-02010-y), 2023-08-26
Supplement: 41375_2023_2010_MOESM1_ESM.pdf [file 41375_2023_2010_MOESM1_ESM.pdf]

## 1 **Supplemental methods**

### 2 **Immunization and Antibody Titer measurement**

3 H2L2 female mice were purchased from Harbour BioMED. Blood  
4 was collected from the 10-week-old mice for baseline  
5 measurements. A subcutaneous immunization consisting of 100  $\mu$ l  
6 of a 1:1 (v: v) mix of RIBI adjuvant (S6322-1VL, Sigma) and 50  $\mu$ g  
7 recombinant TSLPR-Fc fusion proteins in PBS was then  
8 administered to each mouse at the groin region. The mice were  
9 subsequently administered 6 rounds of booster doses on a  
10 biweekly schedule using the same regimen. Titer was measured  
11 at 3 days after the 5th booster dose. The final booster, consisting  
12 of 200  $\mu$ l, was administered intraperitoneally 4 days after the 5th  
13 booster dose. Mice were euthanized 4 days after the final booster  
14 dose, and the spleen was harvested for antigen-specific memory  
15 B-cell sorting.

16 96-well EIA high bind plates (Costar #3361) were coated with 2  
17  $\mu$ g/mL of TSLPR, Fc tag (R&D Systems #981-TR-050) at 4°C  
18 overnight. Plates were blocked with 1% non-fat dry milk plus 1%  
19 BSA in PBS containing 0.05% Tween-20 (PBS-T) for 30 minutes at  
20 room temperature (RT). Plates were then incubated with serial  
21 dilutions of mouse serum in blocking buffer for 1 hr at RT. After  
22 washing, bound antibody was detected by incubation with HRP-  
23 conjugated horse anti-Rat IgG (Cell Signaling #7077) for 1 hr at RT.  
24 Plates were washed again, and then developed using TMB  
25 substrate (Thermo Fisher Scientific). The reaction was stopped

26 using H<sub>2</sub>SO<sub>4</sub> and absorbance was measured at 450 nm using a  
27 CLARIOstar® Plus plate reader (BMG Labtech).

28

### 29 **Single B-cell Cloning (SBCC) of the anti-TSLPR variable region**

30 H2L2 Harbour mice were used to develop the fully human anti-  
31 TSLPR antibody. After 10 weeks of immunization with human  
32 TSLPR-Fc fusion proteins, single B-cells from spleen were sorted  
33 with a panel of biomarkers. After RT-PCR was used to generate  
34 cDNA, Harbour H2L2 heavy (18) and light (11) degenerative  
35 forward primers, together with rat constant region reverse primers,  
36 were used to amplify the variable regions. These variable regions  
37 were subsequently cloned into a pcDNA3.1+ expression vector for  
38 high throughput transient expression of ExpiCHO cells using a 96-  
39 well format.

### 40 **High throughput monoclonal antibody (mAb) production,** 41 **purification, and analysis**

42 High-throughput production of mAbs was performed by micro-scale  
43 transfection (1 mL) of pcDNA3.1+ antibody expression vectors in  
44 Chinese hamster ovarian (CHO) cells using the Gibco™  
45 ExpiCHO™ Expression System and a protocol for deep 96-well  
46 plates (ThermoFisher Scientific). Briefly, synthesized antibody-  
47 encoding DNA (0.8 µg per transfection) was diluted in OptiPro  
48 serum free medium (OptiPro SFM), incubated with ExpiFectamine  
49 CHO Reagent, and added to 750 µL of ExpiCHO cell cultures into  
50 sterile 96 deep well plates using a ViaFlo 96 liquid handler (Integra

51 Biosciences). Plates were placed in an Infors HT Multitron Pro  
52 incubator shaking at 1,000 rpm with 3 mm orbital diameter at 37°C  
53 in 8% CO<sub>2</sub> and 80% humidity. The day after transfection,  
54 ExpiFectamine CHO Enhancer and ExpiCHO Feed reagents were  
55 added to the cells, followed by a 6-day incubation at 32°C in 5%  
56 CO<sub>2</sub> and 80% humidity.

57

58 Cells were harvested by centrifugation at 1500 x g for 10 min and  
59 supernatants were transferred to new deep 96-well plates for high  
60 throughput micro-scale purification. Briefly, clarified culture  
61 supernatants were incubated with 15 µL MabSelect resin (Cytiva,  
62 formerly GE Healthcare Life Sciences) on a 3 mm orbital shaker at  
63 1000 rpm at RT to capture mAb. The mixture was then transferred  
64 to pre-equilibrated fritted deep well filter plates, washed with PBS,  
65 and eluted with 100 µL 50mM phosphoric acid (pH 3.0) into 96-well  
66 plates containing 15 µL neutralization buffer (20X PBS pH 11.0).

67 Recovered fractions were analyzed for yield, size, and purity using  
68 the LabChip® GXII HT Touch™ (Perkin Elmer, CLS138160)  
69 microfluidic CE-SDS platform and the ProteinEXact Reagent Kit  
70 (Perkin Elmer, CLS150466) according to the manufacturer's  
71 protocol. Briefly, 2.5 µl of purified protein was mixed with 18 µl of  
72 sample buffer and 8.75 mM Iodoacetamide (Thermo Fisher  
73 Scientific, A39271) for non-reducing conditions. Samples were then  
74 heated to 70°C for 10 min, cooled to RT, and mixed with 35 µl of  
75 water. The analysis was performed using GXII Reviewer software  
76 and calculations were based on the internal reference ladder.

77

78 **Large scale mAb production and purification**

79

80 For large scale mAb expression, we performed transient  
81 transfections of CHO cell cultures using the Gibco™ ExpiCHO™  
82 Expression System in Erlenmeyer vented cap flasks (Corning) or  
83 single-use ReadyToProcess WAVE Cellbags (Cytiva) containing  
84 the desired volume of ExpiCHO cells following the manufacturer's  
85 protocol. A 1:1 ratio of heavy and light chain plasmids were  
86 transfected for IgG format antibodies while a 1:2:1 ratio of  
87 heavy:light:CD3 scFv plasmids were transfected for bispecific  
88 antibodies. Antibodies were purified from filtered culture  
89 supernatants by fast protein liquid chromatography (FPLC) on an  
90 ÄKTA Pure instrument using a HiTrap MabSelect Prisma column  
91 (Cytiva). IgG format antibodies were eluted by 20mM sodium  
92 citrate (pH 3.0) and bispecific format antibodies were eluted with  
93 0.5M arginine (pH 4.0). Purified mAbs were concentrated and  
94 buffer exchanged into PBS using Amicon® Ultra 50KDa Centrifugal  
95 Filter Units (Millipore Sigma), filtered using sterile 0.2 µm pore size  
96 filter devices (Millipore), and stored in aliquots at 4°C until future  
97 use.

98

99 **MAb quantification**

100 To quantify purified mAbs, absorption at 280 nm (A280) was  
101 measured using a NanoDrop (ThermoFisher Scientific). mAb

102 concentration was calculated using the IgG sample type setting,  
103 which uses a typical molar extinction coefficient for IgG, on the  
104 NanoDrop.

105

### 106 **Biolayer Interferometry (BLI) for Anti-TSLPR monoclonal** 107 **antibody screening**

108 BLI assays were performed on the Octet Red384 instrument at  
109 30°C with shaking at 1,000 RPM. The mAb binding screen was  
110 performed after 96-well high-throughput expression and protein A  
111 purification. The different clones of mAbs were diluted in PBS to a  
112 concentration of 100nM (15µg/ml) and captured using anti-human  
113 IgG Fc capture (AHC) biosensors for 600 seconds. After loading,  
114 the baseline signal was then recorded for 60 seconds in 10xkinetics  
115 buffer from the vendor. The sensors were then immersed in  
116 10xkinetics buffer containing 100, 20, or 4nM TSLPR-His  
117 recombinant protein for a 300 second association step. The  
118 dissociation was then measured for 300 seconds by immersing  
119 sensors in 10xkinetics buffer. As a control for non-specific binding,  
120 the background signal of empty sensors without loading antibodies  
121 was subtracted at each time point.

### 122 **Kinetic analyses**

123 For kinetic analyses, either 1B7 or 1B7/CD3e bispecific antibodies  
124 was captured using AR2G sensors; ligands were diluted to 100  
125 nM in 10xkinestics and loaded for 600 seconds. After the loading

126 and quenching of the active AR2G surface by 1M ethanolamine,  
127 the baseline signal was then recorded for 1 min in 10xkinetics.

128

129 **Binding of anti-TSLPR and 1B7/CD3 antibodies to human and**  
130 **cynomolgus monkey peripheral blood mononuclear cells**  
131 **(PBMCs)**

132

133 Binding of anti-TSLPR IgG and 1B7/CD3 bispecific antibodies  
134 were analyzed using PBMCs from at least three different healthy  
135 individuals and cynomolgus monkeys. Human PBMCs were  
136 isolated from buffy coat and cynomolgus PBMCs were isolated  
137 from whole blood (KCCMR). Isolated PBMCs were stained with  
138 either anti-TSLPR or 1B7/CD3 together with the following  
139 leukocyte phenotype markers: CD3 (BD pharmingen), CD4, CD8,  
140 CD14, CD16, CD20 and CD56 (Biolegend). Data were acquired  
141 by flow cytometry and analyzed using FlowJo as described  
142 previously.

143

144 **Generation and maturation of human monocyte-derived**  
145 **dendritic cells**

146 PBMCs were isolated by Ficoll-Hypaque gradient centrifugation  
147 from healthy donors. Monocytes were purified with a CD14  
148 isolation kit following the manufacturer's protocol (Miltenyi Biotec,  
149 Bergisch Gladbach, Germany). Purified monocytes were cultured

150 in RPMI with 10% FBS, 50uM beta-mercaptoethanol, hGM-CSF  
151 (100ng/mL, R&D), and hIL-4 (100ng/mL, R&D) for 5-7 days and  
152 subsequently matured with TNF- $\alpha$  for 24 hours. TSLPR  
153 expression of both immature and matured dendritic cells was  
154 tested by flow cytometry with anti-TSLPR-AF647.

155

## 156 **Supplemental Figure legends**

### 157 **Supplemental Figure 1. Development of anti-TSLPR** 158 **monoclonal antibodies (mAbs).**

159 **(A)** Schematic of immunization in human transgenic mice. H2L2  
160 Harbour human transgenic mice were immunized for 10 weeks  
161 with hTSLPR-Fc antigen, and the spleen was harvested. **(B)**  
162 Single cell sorting of antigen-specific memory B cells. mCD19 and  
163 hTSLPR-positive cells were sorted for single B-cell cloning  
164 (SBCC). **(C)** Single cell RT-PCR. Example of single cell reverse  
165 transcription (RT) and PCR of TSLPR variable heavy (VH) and  
166 variable light (VL) gene regions. **(D-E)** mAbs isolated from SBCC  
167 were tested for binding to the TSLPR antigen. (D) Affinity statistics  
168 and (E) the correlation between  $K_{on}$  and  $K_{off}$  were plotted using  
169 Bio-Layer Interferometry. **(F)** Octet analysis shows blockage of  
170 TSLP binding to TSLPR by anti-TSLPR mAbs. **(G)** Germline  
171 distribution of all the discovered anti-TSLPR mAbs, as calculated  
172 by IgBlast. **(H)** Representative epitopes binnings were shown to

173 indicate the group of bins by both competing antibodies and TSLP  
174 ligand blockage.

175 **Supplemental Figure 2. Cytotoxicity of 1B7/CD3 in REH cells.**

176 **(A)** REH cells with high, medium, or low TSLPR expression and a  
177 luciferase marker were incubated with different concentrations of  
178 1B7/CD3 bispecific or control antibodies. PBMC-derived human  
179 CD8<sup>+</sup> cells were then added at a 5:1 ratio (E: T), and flow  
180 cytometry was used to determine cell viability after 48 hr. (B and  
181 C) AF750 tagged human T cells (B) or BM cells (C) were  
182 incubated with different concentrations of 1B7/CD3 BsAb or  
183 control antibody before adding untagged effector T cells at a 5:1  
184 ratio (E: T). Flow cytometry was used to determine the cell viability  
185 after 48 hr.

186 **Supplemental Figure 3. Pharmacodynamic changes upon**  
187 **1B7/CD3 treatment in donor 875 PBMC humanized BOS-1**  
188 **patient-derived xenograft (PDX) models.**

189 **(A-C)** Percentage of CD3<sup>+</sup> T cells in (A) blood, (B) spleen, and (C)  
190 the bone marrow (BM) of donor 875 humanized (PMBC-875) mice  
191 treated with 0.01, 0.1, or 1 mg/kg 1B7/CD3 or control (PBS).  
192 Samples were collected at either (A) indicated time points or (B-C)  
193 at end of experiment. Data analyzed by GraphPad Prism 9 and  
194 are shown as mean  $\pm$  SD; \*\*p< 0.01, \*p<0.05 compared with  
195 control. **(D)** Immunohistochemistry analysis of CD3 in the BM or



196 spleen and of HLA-A in the BM in donor 875 humanized mice  
197 (PMBC-875) at the end of the efficacy study.

198 **Supplemental Figure 4. Binding pattern of anti-TSLPR (1B7)**  
199 **IgG1 and 1B7/CD3 bispecific antibodies (BsAb) to human and**  
200 **cynomolgus monkey PBMC (T cells).**

201 **(A)** Flow cytometry analysis showing the binding of 1B7 IgG and  
202 1B7/CD3 BsAbs to PBMCs from at least three different healthy  
203 individuals (human) or from cynomolgus monkeys. Isolated  
204 PBMCs were stained with either anti-TSLPR or 1B7/CD3 BsAbs  
205 with the following leukocyte phenotype markers: CD3, CD4, CD8,  
206 CD14, CD16, CD20 and CD56. Representative figures of 1B7  
207 IgG1 and 1B7/CD3 staining are shown in CD3 positive T cell  
208 population. Isotype is shown in blue, and 1B7 and 1B7/CD3  
209 staining are shown in red. **(B)** Monocyte-derived DCs were  
210 cultured with (right panel) or without (left panel) TNF $\alpha$  for 24 hours  
211 before TSLPR expressions were determined by flow cytometry  
212 with 1B7-AF647. An isotype control-AF647 antibody was used to  
213 set up the positive gate. **(C)** Normal cynomolgus BM cells were  
214 collected and stained for CD20 and 1B7 (red) or isotype control  
215 (blue). Expression of TSLPR on CD20+ cells were shown in the  
216 histogram figure.

217

218

# Suppl. Figure 1

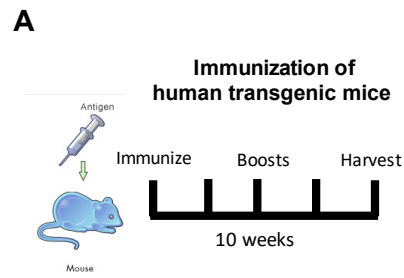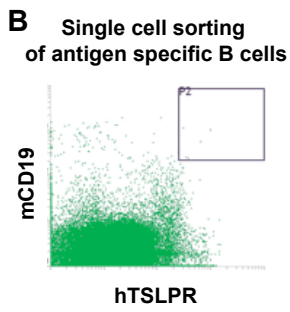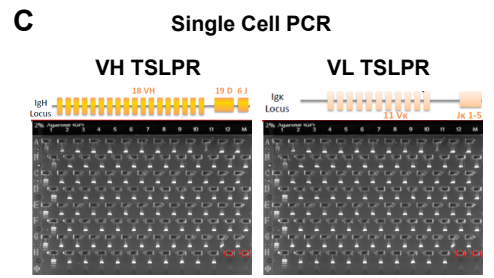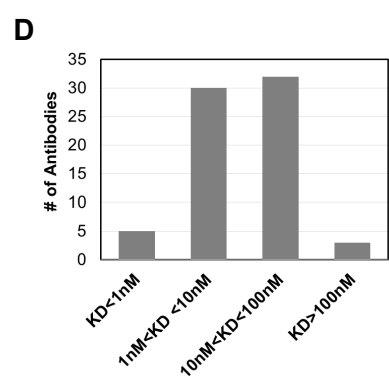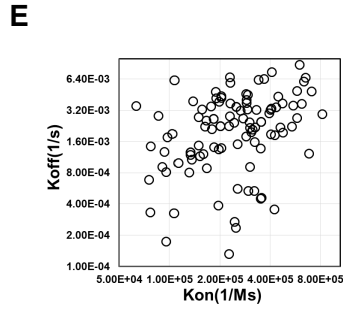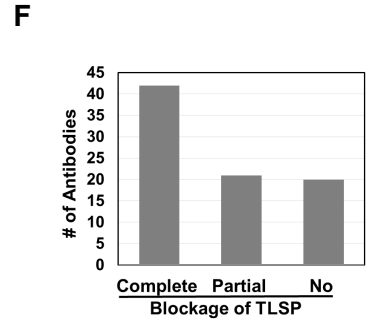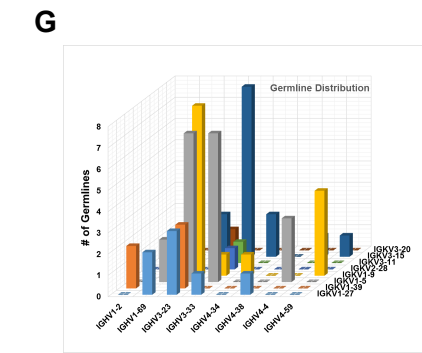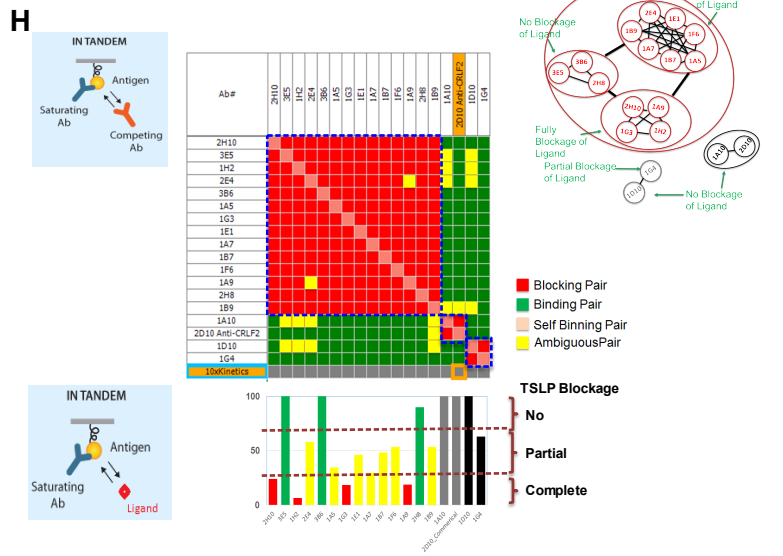

A

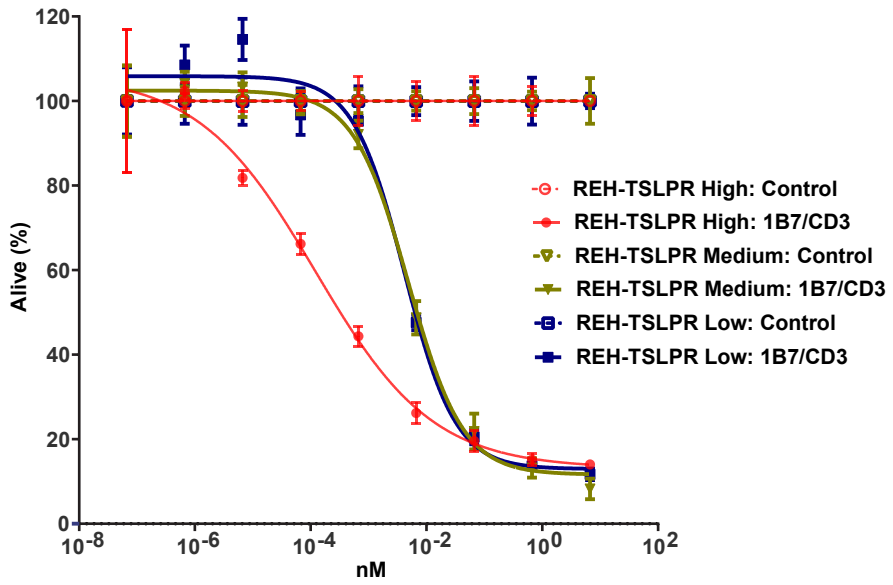

B

T cell from PBMC as target cell

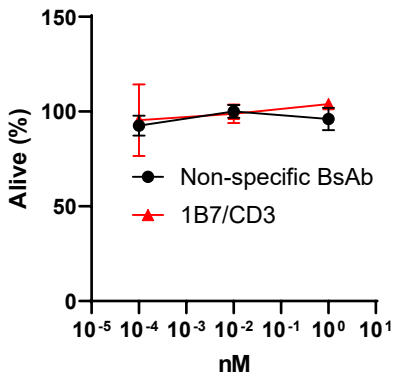

C

Bone marrow cells

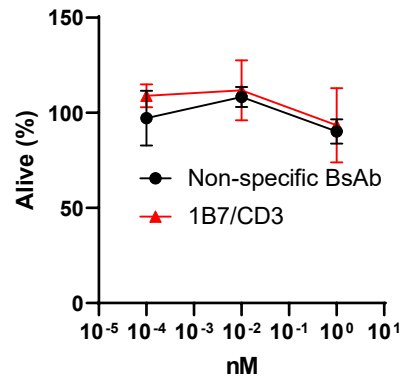

A

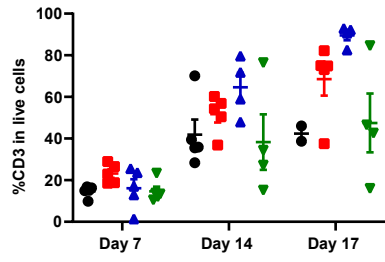

B

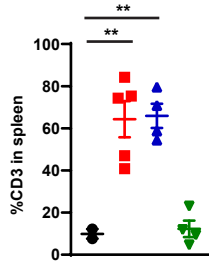

C

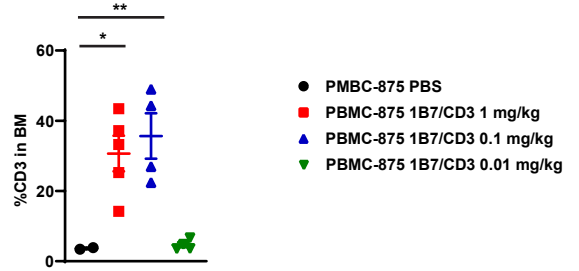

D

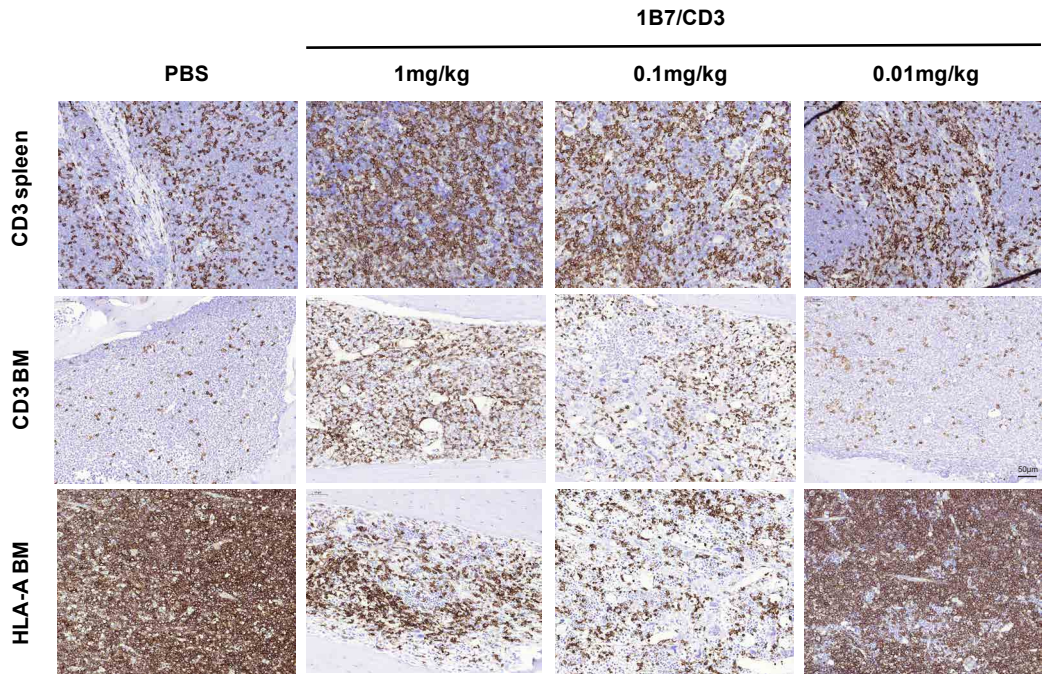

# Suppl. Figure 4

## A

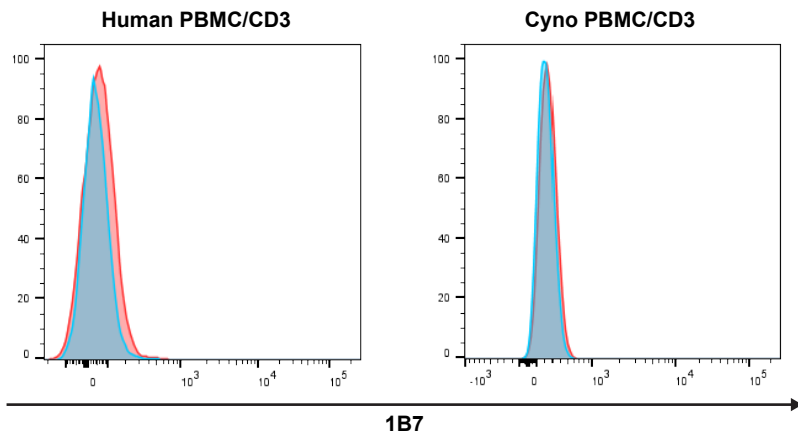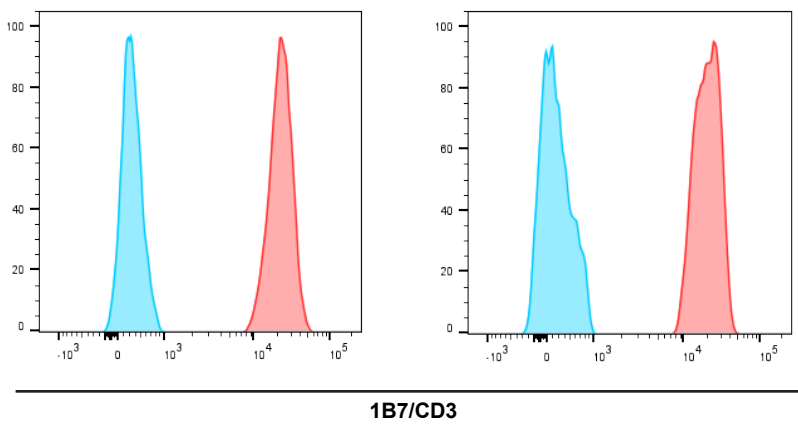

## B

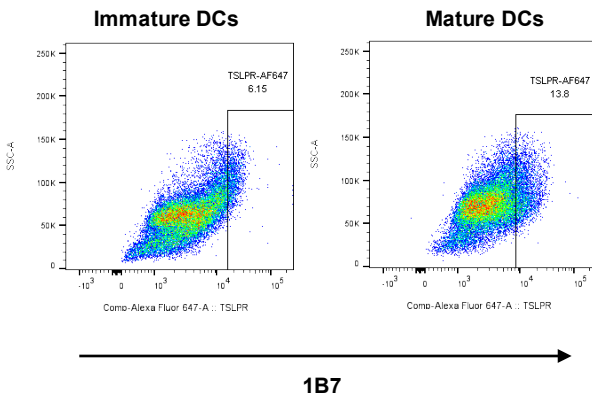

## C

Cynomolgus BM cells/CD20+

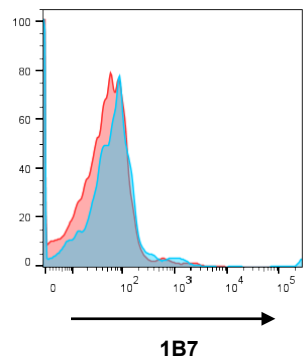

## Suppl.table 1-2

**Table 1. Pharmacokinetics of 1B7/CD3 BsAb in NSG mice at 1 and 0.3 mg/kg**

| Dosing<br>(mg/kg) | Lambda_z<br>(1/hr) | T1/2<br>(hr)  | Tmax<br>(hr) | Cmax<br>(ng/ml) | AUCINF_obs<br>(hr*ng/ml) | Vz_obs<br>(ml/kg) | Cl_obs<br>(ml/hr/kg) |
|-------------------|--------------------|---------------|--------------|-----------------|--------------------------|-------------------|----------------------|
| 1                 | 0.00299±0.000393   | 234.79±30.506 | 4.333±2.887  | 4019.33±674.579 | 1506434±292201           | 0.00023±2.86E-05  | 6.8E-07±0.00000012   |
| 0.3               | 0.003±0.001        | 227.3±35.784  | 10.33±12.1   | 1890±744.85     | 398447±32875.668         | 0.00025±0.0000584 | 7.6E-07±0.00000006   |

**Table 2. Pharmacokinetics of 1B7/CD3 BsAb in humanized NSG mice at 1 and 0.3 mg/kg**

| Dosing<br>(mg/kg) | Lambda_z<br>(1/hr) | T1/2<br>(hr)   | Tmax<br>(hr) | Cmax<br>(ng/ml)   | AUCINF_obs<br>(hr*ng/ml) | Vz_obs<br>(ml/kg) | Cl_obs<br>(ml/hr/kg) |
|-------------------|--------------------|----------------|--------------|-------------------|--------------------------|-------------------|----------------------|
| 1                 | 0.007±0.003        | 122.639±70.156 | 6.000±0      | 2764.120±2764.120 | 283064.903±139971.589    | 613.600±104.418   | 4.050±1.339          |
| 0.3               | 0.007±0.002        | 99.510±25.321  | 6.000±0      | 827.298±163.509   | 69870.336±19523.340      | 626.750±97.793    | 4.582±1.403          |

Cmax, maximum (peak) concentration [ng/mL]; tmax, time to reach Cmax [hr]; t1/2, elimination half-life [hr]; AUC, area under the curve [hr\*ng/mL]; CL, clearance [mL/hr/kg]; Vz, volume of distribution [mL/kg]; F, female; M, male; N, number of animals; SD, standard deviation.

| Supplementary Table 3 -- TISSUE COLLECTION AND PRESERVATION |       |         |                        |                                                                                                                                 |
|-------------------------------------------------------------|-------|---------|------------------------|---------------------------------------------------------------------------------------------------------------------------------|
| TISSUE                                                      | WEIGH | COLLECT | MICROSCOPIC EVALUATION | COMMENT                                                                                                                         |
| Artery, aorta                                               | -     | x       | x                      | -                                                                                                                               |
| Bone, femur                                                 | -     | x       | x                      | -                                                                                                                               |
| Bone, sternum                                               | -     | x       | x                      | -                                                                                                                               |
| Bone marrow, femur                                          | -     | x       | x                      | -                                                                                                                               |
| Bone marrow, sternum                                        | -     | x       | x                      | Five brain levels to be examined                                                                                                |
| Brain <sup>a</sup>                                          | x     | x       | x                      | -                                                                                                                               |
| Esophagus                                                   | -     | x       | x                      | -                                                                                                                               |
| Eye, left                                                   | -     | x       | x                      | Preserve in modified Davidson's fixative.                                                                                       |
| Eye, right                                                  | -     | x       | x                      | Preserve in modified Davidson's fixative.                                                                                       |
| Gallbladder                                                 | -     | x       | x                      | -                                                                                                                               |
| Gland, adrenal, left                                        | x     | x       | x                      | -                                                                                                                               |
| Gland, adrenal, right                                       | x     | x       | x                      | -                                                                                                                               |
| Gland, mammary                                              | -     | x       | x                      | For males, examine only if present in routine section of skin.                                                                  |
| Gland, parathyroid, left                                    | -     | x       | x                      | Examine only if present in the routine section of thyroid.                                                                      |
| Gland, parathyroid, right                                   | -     | x       | x                      | Examine only if present in the routine section of thyroid.                                                                      |
| Gland, pituitary                                            | x     | x       | x                      | -                                                                                                                               |
| Gland, salivary                                             | -     | x       | x                      | Both collected; only 1 required for microscopic examination.                                                                    |
| Gland, thyroid, left                                        | x     | x       | x                      | Weight includes parathyroid                                                                                                     |
| Gland, thyroid, right                                       | x     | x       | x                      | Weight includes parathyroid                                                                                                     |
| Gross lesion                                                | -     | x       | x                      | -                                                                                                                               |
| Gut-associated lymphoid tissue                              | -     | x       | x                      | Examine only if present in routine section of intestines.                                                                       |
| Heart                                                       | x     | x       | x                      | -                                                                                                                               |
| Kidney, left                                                | x     | x       | x                      | -                                                                                                                               |
| Kidney, right                                               | x     | x       | x                      | -                                                                                                                               |
| Large intestine, cecum                                      | -     | x       | x                      | -                                                                                                                               |
| Large intestine, colon                                      | -     | x       | x                      | -                                                                                                                               |
| Large intestine, rectum                                     | -     | x       | x                      | -                                                                                                                               |
| Liver                                                       | x     | x       | x                      | Draine gallbladder before weighing.                                                                                             |
| Lung                                                        | -     | x       | x                      | -                                                                                                                               |
| Lymph node, mandibular                                      | -     | x       | x                      | Only 1 required for examination.                                                                                                |
| Lymph node, mesenteric                                      | -     | x       | x                      | Only 1 required for examination.                                                                                                |
| Muscle, quadriceps femoris                                  | -     | x       | x                      | -                                                                                                                               |
| Nerve, optic, left                                          | -     | x       | x                      | Examine only if present in the routine section of the eye. Preserve in modified Davidson's fixative.                            |
| Nerve, optic, right                                         | -     | x       | x                      | Examine only if present in the routine section of the eye. Preserve in modified Davidson's fixative.                            |
| Nerve, sciatic                                              | -     | x       | x                      | Both collected; only 1 required for microscopic examination.                                                                    |
| Ovary, bilateral                                            | -     | x       | x                      | Paired examination.                                                                                                             |
| Pancreas                                                    | -     | x       | x                      | -                                                                                                                               |
| Site, injection                                             | -     | x       | x                      | Location: peripheral vein, as documented in NONHUMAN PRIMATE DOSE FORM (KCCMR Form 224)                                         |
| Skin                                                        | -     | x       | x                      | Location: chest                                                                                                                 |
| Small intestine, duodenum                                   | -     | x       | x                      | -                                                                                                                               |
| Small intestine, ileum                                      | -     | x       | x                      | -                                                                                                                               |
| Small intestine, jejunum                                    | -     | x       | x                      | -                                                                                                                               |
| Spinal cord                                                 | -     | x       | x                      | Examine one transverse and one oblique section from each of the following areas: cranial cervical, mid-thoracic, caudal lumbar. |
| Spleen                                                      | x     | x       | x                      | -                                                                                                                               |
| Stomach                                                     | -     | x       | x                      | -                                                                                                                               |
| Thymus                                                      | -     | x       | x                      | -                                                                                                                               |
| Tongue                                                      | -     | x       | x                      | -                                                                                                                               |
| Trachea                                                     | -     | x       | x                      | -                                                                                                                               |
| Urinary bladder                                             | -     | x       | x                      | -                                                                                                                               |
| Uterus                                                      | -     | x       | x                      | -                                                                                                                               |
| Vagina                                                      | -     | x       | x                      | -                                                                                                                               |

x=Procedure to be conducted; - = Not applicable

<sup>a</sup> The brain will be sectioned generally according to the recommendations in the Society of Toxicologic Pathology (STP) Position paper regarding sampling the nervous system (Bolon et al., 2013), but with the modification that level 1 (olfactory) will not be examined and levels 5, 6, and 7 will be combined into two levels only.

**Supplementary Table 4 Antibody List**

| <b>Antibody</b>                 | <b>Vendor</b>     | <b>Catalog #</b> |
|---------------------------------|-------------------|------------------|
| RAT ANTI HUMAN CD3              | AbD Serotec       | MCA1477T         |
| Recombinant Anti-HLA A antibody | abcam             | ab52922          |
| Ghost dye BV510                 | Tonbo Biosciences | 13-0870-T100     |
| mCD45 APC-eFluor 780            | eBioscience       | 47-0451-82       |
| hCD45 BV421                     | BD Biosciences    | 563879           |
| hCD3 APC                        | BD Biosciences    | 557597           |
| hCD4 PerCP/Cy5.5                | BioLegend         | 317428           |
| hCD8 BV785                      | BioLegend         | 301046           |
| hCD14 BV786                     | BD Horizon        | 563698           |
| hCD16 APC-Cy7                   | Biolegend         | 302018           |
| hCD19 BUV737                    | BD Biosciences    | 612756           |
| hCD20 PE-Cy5                    | BioLegend         | 302308           |
| CD25 BV786                      | Biolegend         | 302638           |
| hCD45RA APC                     | BioLegend         | 304112           |
| hCD45RO PE                      | BioLegend         | 304206           |
| CD56 FITC                       | BD Pharmingen     | 562794           |
| hCD62L BV650                    | BioLegend         | 304832           |
| hCD69 PE-Cy7                    | BioLegend         | 310912           |
| hTSLPR PE-Cy7                   | BioLegend         | 322810           |
| hHLA-A2 FITC                    | BD Biosciences    | 551285           |
